# Supplementary material for: Graphene quantum dots for the inhibition of β amyloid aggregation
Source: Royal Society of Chemistry journal article supplement (doi:10.1039/c5nr06282a), 2015-01-01
Supplement: c5nr06282a1.pdf [file c5nr06282a1.pdf]

## Graphene Quantum Dots for the Inhibition of $\beta$ Amyloid Aggregation

Yibiao Liu,<sup>a,b</sup> Li-Ping Xu,<sup>\*a,b</sup> Wenhao Dai,<sup>a,b</sup> Haifeng Dong,<sup>a,b</sup> Yongqiang Wen,<sup>a,b</sup>  
and Xueji Zhang<sup>\*a,b</sup>

<sup>a</sup>Research Center for Bioengineering and Sensing Technology, University of Science  
& Technology Beijing, Beijing 100083, P.R. China.

<sup>b</sup>School of Chemistry and Biological Engineering, University of Science and  
Technology Beijing, Beijing, 100083, P.R. China

\*Address correspondence, Fax: 86-10-82375840; Tel: 86-10-82375840;

E-mail: xuliping@ustb.edu.cn; [zhangxueji@ustb.edu.cn](mailto:zhangxueji@ustb.edu.cn).

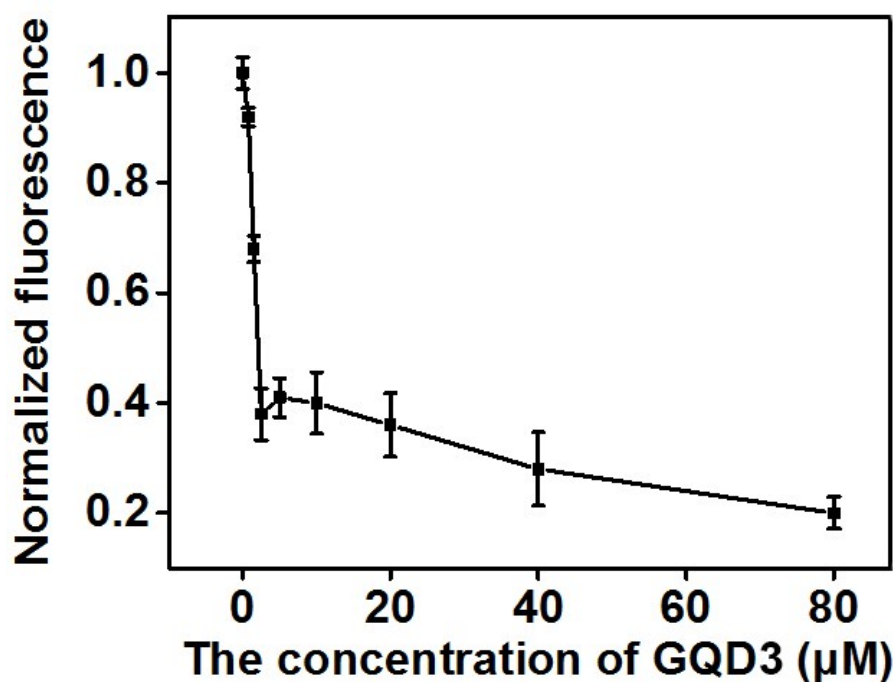

**Figure S1.** Dose-dependent inhibition of A $\beta$ 1-42 fibrillization by GQD3. The excitation wave-length was 450 nm, and the emission intensity at 490 nm was used for analysis.

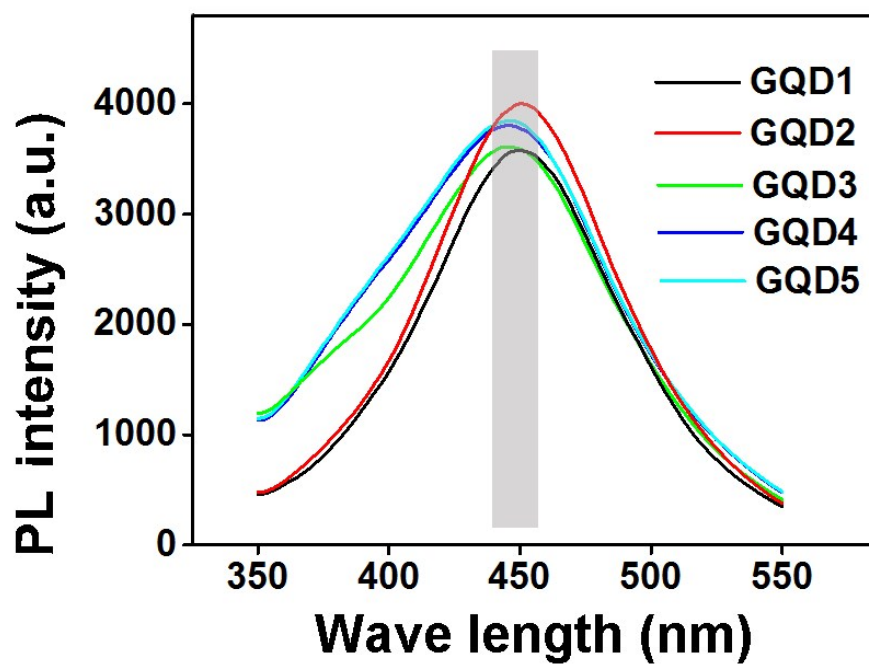

**Figure S2.** The photoluminescence spectra of five kinds of GQDs with different charges in water/ethanol.

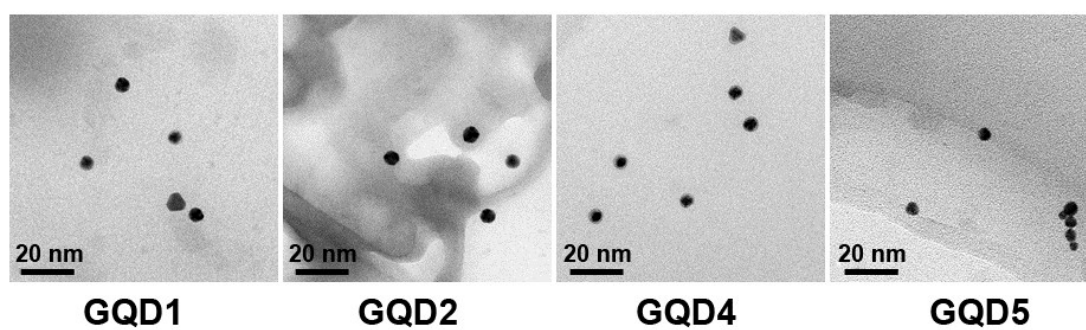

**Figure S3.** TEM images of GQD1, GQD2, GQD4 and GQD5.

**Table S1.** The IC<sub>50</sub> values of some reported Aβ1-42 or Aβ1-40 inhibitors

| Inhibitor                                                          | IC <sub>50</sub> (μM) | Assay method      | Reference |
|--------------------------------------------------------------------|-----------------------|-------------------|-----------|
| Benzofurans                                                        | 8-48                  | Immunoassay       | [45]      |
| HMP                                                                | 20                    | Immunoassay       | [46]      |
| Melatonin                                                          | 20                    | Th T fluorescence | [47]      |
| K <sub>8</sub> [P <sub>2</sub> CoW <sub>17</sub> O <sub>61</sub> ] | 16                    | Th T fluorescence | [48]      |
| Fullerene                                                          | 9                     | Th T fluorescence | [21]      |
| GQDs                                                               | 8                     | Th T fluorescence | This work |
